# Supplementary material for: Synthesis, <sup>123</sup>I-Radiolabeling Optimization, and Initial Preclinical Evaluation of Novel Urea-Based PSMA Inhibitors with Tributylstannyl Prosthetic Group in Their Structures
Source: Preprints.org preprint supplement (doi:10.20944/preprints202307.0262.v1), 2023-07-05
Supplement: Supplementary file 1 [file supplementary]

Synthesis, 123I-radiolabeling optimization, and initial preclinical evaluation of novel urea-based PSMA inhibitors with tributylstannyl prosthetic group in their structures

Lutfi A. Hasnowo 1,2*, Maria S. Larkina 3,4, Evgenii Plotnikov 3,8, Vitalina Bodenko 3,4, Feruza Yuldasheva 3, Elena Stasyuk 1, Stanislav A. Petrov 5,Nikolai Y. Zyk 5, Aleksei E. Machulkin 5, Nikolai I. Vorozhtsov 5, Elena K. Beloglazkina 5*, Valentine G. Nenajdenko 5, Vladimir Tolmachev 6, Anna Orlova 7, Alexander G. Majouga 9, and Mekhman S. Yusubov 3

1 School of Nuclear Science and Engineering, Tomsk Polytechnic University, Tomsk, 634050, Russia

2 Polytechnic Institute of Nuclear Technology, National Research and Innovation Agency, Yogyakarta, 55281, Indonesia

3 Research Centrum for Oncotheranostics, Research School of Chemistry and Applied Biomedical Sciences, Tomsk Polytechnic University, Tomsk, 634050, Russia

4 Department of Pharmaceutical Analysis, Siberian State Medical University, Tomsk, 634050, Russia

5 Department of Chemistry, M.V. Lomonosov Moscow State University Leninskie Gory, 1-3, 119991 Moscow, Russian Federation

6 Department of Immunology, Genetics and Pathology, Uppsala University, 75185 Uppsala, Sweden

7 Department of Medicinal Chemistry, Uppsala University, 751 83 Uppsala, Sweden

8 Mental Health Reseach Institute, Tomsk National Research Medical Center, Russian Academy of Sci-ences, 634014, Tomsk, Russia

9 Dmitry Mendeleev University of Chemical Technology of Russia, Miusskaya sq. 9, Moscow, 125047, Russian Federation

***** Correspondence: [lutf006@brin.go.id](mailto:lutf006@brin.go.id), [beloglazki@mail.ru](mailto:beloglazki@mail.ru)

**Supplementary Information**

**Table of contents**

1. 1H NMR spectrum of compound № **6** …………………………..……………………………………………….………….…………………. 4
2. 13C NMR spectrum of compound № **6** …………………………..…………………………………………………………………….…….…. 5
3. ESI-MS of compound № **6** …………………………..…………………………………………………………………….………………….…. 6
4. 1H NMR spectrum of compound № **9** …………………………..……………………………………………….………….…………………. 7
5. 13C NMR spectrum of compound № **9** …………………………..…………………………………………………………………….…….….8
6. ESI-MS of compound № 9 …………………………..…………………………………………………………………….………………….…. 9
7. HRMS (m/z, ESI) of compound № **9** ...…………………………..……………………………………………….………….…………...……. 10
8. 1H NMR spectrum of compound № **10** …………………………..………………………………………………………………….…..……. 11
9. 13C NMR spectrum of compound № **10** …………..…………………………………………………………………….………………….…. 12
10. ESI-MS of compound № **10** ……………………………………………………………………………………….………….…...……………. 13
11. HRMS (m/z, ESI) of compound № **10** …………………………..…………………………………………………...……………….…….…. 14
12. 1H NMR spectrum of compound № **11** …………..……...…………………………………………………………….………….……….…. 15
13. 13C NMR spectrum of compound № **11** ………………………..………………………………………………..………….……….……..…. 16
14. ESI-MS of compound № **11** ……………………….….…………..………………………………………………….………………….…...…. 17
15. HRMS (m/z, ESI) of compound № **11** ……………..…………………………………………………………………….………………….…. 18
16. 1H NMR spectrum of compound № **13** …………………………..…………………………………………….……….….…………………. 19
17. 13C NMR spectrum of compound № **13** …………………………..………………………………………………………………….…….…. 20
18. ESI-MS of compound № **13** ………………………..……………………………………………………………………..………………….…. 21
19. HRMS (m/z, ESI) of compound № **13** ...………………………..……………………………………………….……….….…………………. 22
20. 1H NMR spectrum of compound № **14** …………………………..………………………………………………………………….…..….… 23
21. 13C NMR spectrum of compound № **14** …………..…………………………………………………………………….………………….…. 24
22. 1H NMR spectrum of compound № **16** ……………………………………………………………………………………….………….….... 25
23. 13C NMR spectrum of compound № **16** …………………………..…………………………………………………...….…………….….…. 26
24. HRMS (m/z, ESI) of compound № **16** …………..……...…………………………………………………………….……………………..…. 27
25. 1H NMR spectrum of compound № **17** …………………………..…………………………………………….….………….………………. 28
26. 13C NMR spectrum of compound № **17**…………………………..……………………………………………………………………...……. 29
27. 1H NMR spectrum of compound № **18** …………………………..……………………………………………………………………...……. 30
28. 13C NMR spectrum of compound № **18** …………………………..……………………………………………….………….………….…… 31
29. ESI-MS of compound № **18** …………………………..……………………………………………………….………………………..…….… 32
30. HRMS (m/z, ESI) of compound № **18** ………………………………….………………………………………………………………..….…. 33
31. 1H NMR spectrum of compound № **19** ………………………..……………………………………………….………….………………….. 34
32. 13C NMR spectrum of compound № **19** …………..…………………………………………………………………….………………….…. 35
33. HRMS (m/z, ESI) of compound № **19** …………………………..…………………………………………….……...……………….…….…. 36
34. 1H NMR spectrum of compound № **20** …………..……...…………………………………………………….……….…………………..…. 37
35. 13C NMR spectrum of compound № **20** …………………………..…………………………………………….……………………….……. 38
36. HRMS (m/z, ESI) of compound № **20** ……………………………..……………………………………………….………….………………. 39
37. 1H NMR spectrum of compound № **21** …………………………..…………………………………………….…….……………….…….… 40
38. 13C NMR spectrum of compound № **21** ……………..…………………………………………………………………….……………….…. 41
39. ESI-MS of compound № **21** ...…………………………..……………………………………………….…………………....……………...…. 42
40. HRMS (m/z, ESI) of compound № **21** …………………………..………………………………………………………………….…..….…... 43
41. 1H NMR spectrum of compound № **22** …………..…………………………………………………………….……….………………….…. 44
42. 13C NMR spectrum of compound № **22** …………………………..…………………………………………………………………….…….. 45
43. ESI-MS of compound № **22** …………………………..………………………………………………………….……….………………….…. 46
44. HRMS (m/z, ESI) of compound № **22** ...…………………………..…………………………………………….….………….………………. 47
45. Radio-HPLC chromatograms of [123I]PSMA-p-IB yield …………………………..……….………………….…………………….…….…. 48
46. Radio-iTLC chromatogram of [123I]PSMA-p-IB yield …..……………………………..……………………….…..…………..………….…. 49
47. Chromatograms of [123I]PSMA-p-IB after purification …………………………..……………….…………….………………………....…. 50
48. Radio-HPLC chromatogram of [123I]PSMA-p-IB after 3 days storage period …..…………….……………….…………………..………. 51
49. Radio-iTLC and radio-HPLC chromatograms of [123I]PSMA-m-IB ……………………………………...…………………………………. 52

**Compound 6**

**Figure S1**. 1H NMR spectrum of compound № **6** in DMSO-*d6*.

**Figure S2**. 13C NMR spectrum of compound № **6** in DMSO-*d6*.


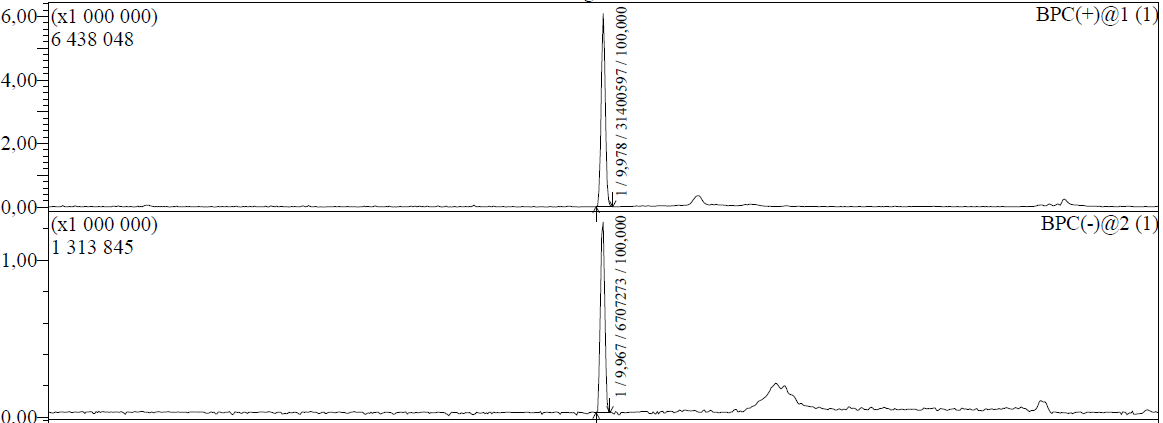

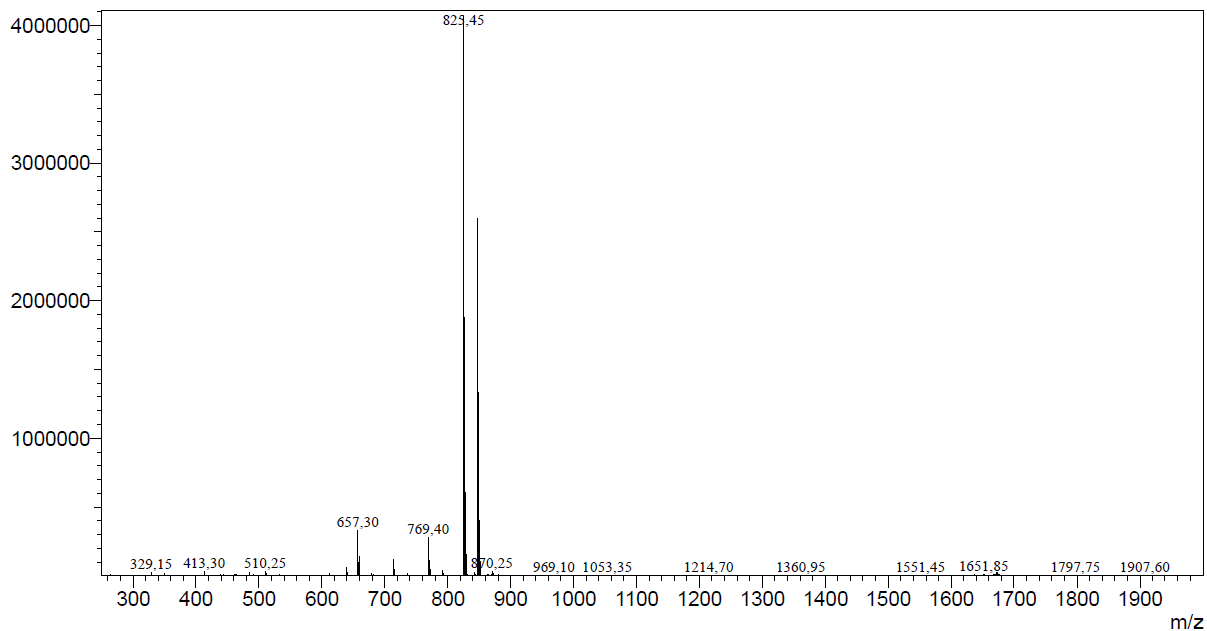


**Figure S3**. ESI-MS of compound № **6**

**Compound 9**

**Figure S4**. 1H NMR spectrum of compound № **9** in DMSO-*d6*.

**Figure S5**. 13C NMR spectrum of compound № **9** in DMSO-*d6*.


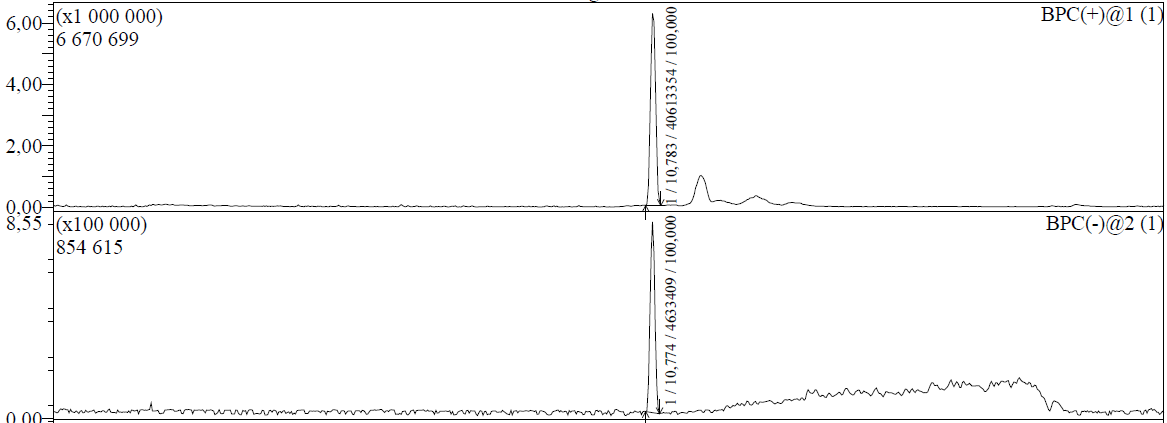


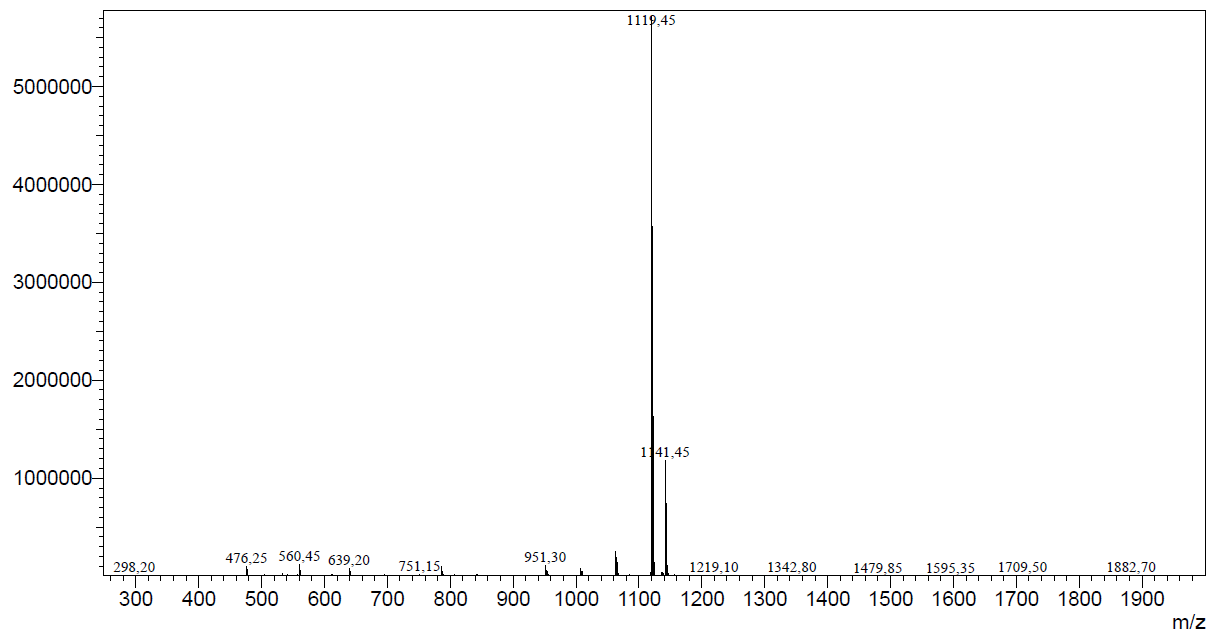


**Figure S6**. ESI-MS of compound № **9**

**Figure S7**. HRMS (m/z, ESI) of compound № **9**

**Compound 10**

**Figure S8**. 1H NMR spectrum of compound № **10** in DMSO-*d6*.

**Figure S9**. 13C NMR spectrum of compound № **10** in DMSO-*d6*.

**Figure S10**. ESI-MS of compound № **10**


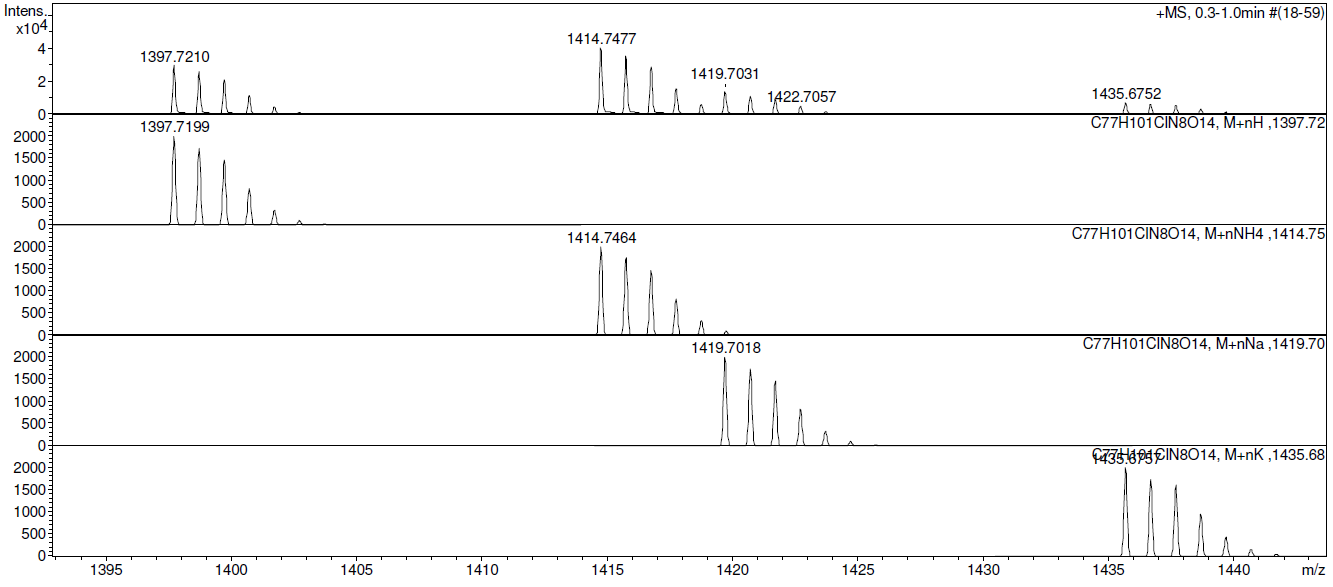


**Figure S11**. HRMS (m/z, ESI) of compound № **10**

**Compound 11**

**Figure S12**. 1H NMR spectrum of compound № **11** in DMSO-*d6*.

**Figure S13**. 13C NMR spectrum of compound № **11** in DMSO-*d6*.

**Figure S14**. ESI-MS of compound № **11**


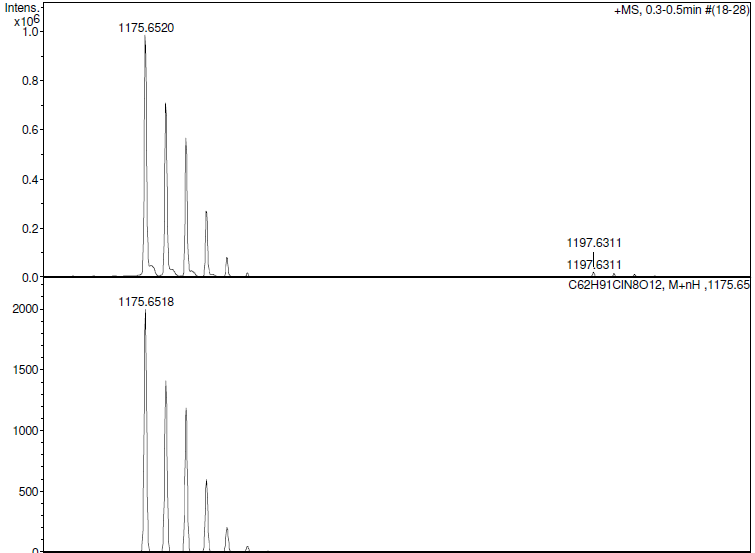


**Figure S15**. HRMS (m/z, ESI) of compound № **11**

**Compound 13**

**Figure S16**. 1H NMR spectrum of compound № **13** in DMSO-*d6*.

**Figure S17**. 13C NMR spectrum of compound № **13** in DMSO-*d6*.

**Figure S18**. ESI-MS of compound № **13**

**Figure S19**. HRMS (m/z, ESI) of compound № **13**

**Compound 14**

**Figure S20**. 1H NMR spectrum of compound № **14** in DMSO-*d6*.

**Figure S21**. 13C NMR spectrum of compound № **14** in DMSO-*d6*.

**Compound 16**

**Figure S22**. 1H NMR spectrum of compound № **16** in DMSO-*d6*.

**Figure S23**. 13C NMR spectrum of compound № **16** in DMSO-*d6*.

**Figure S24**. HRMS (m/z, ESI) of compound № **16**

**Compound 17**

**Figure S25**. 1H NMR spectrum of compound № **17** in DMSO-*d6*.

**Figure S26**. 13C NMR spectrum of compound № **17** in DMSO-*d6*.

**Compound 18**

**Figure S27**. 1H NMR spectrum of compound № **18** in DMSO-*d6*.

**Figure S28**. 13C NMR spectrum of compound № **18** in DMSO-*d6*.

**Figure S29**. ESI-MS of compound № **18**


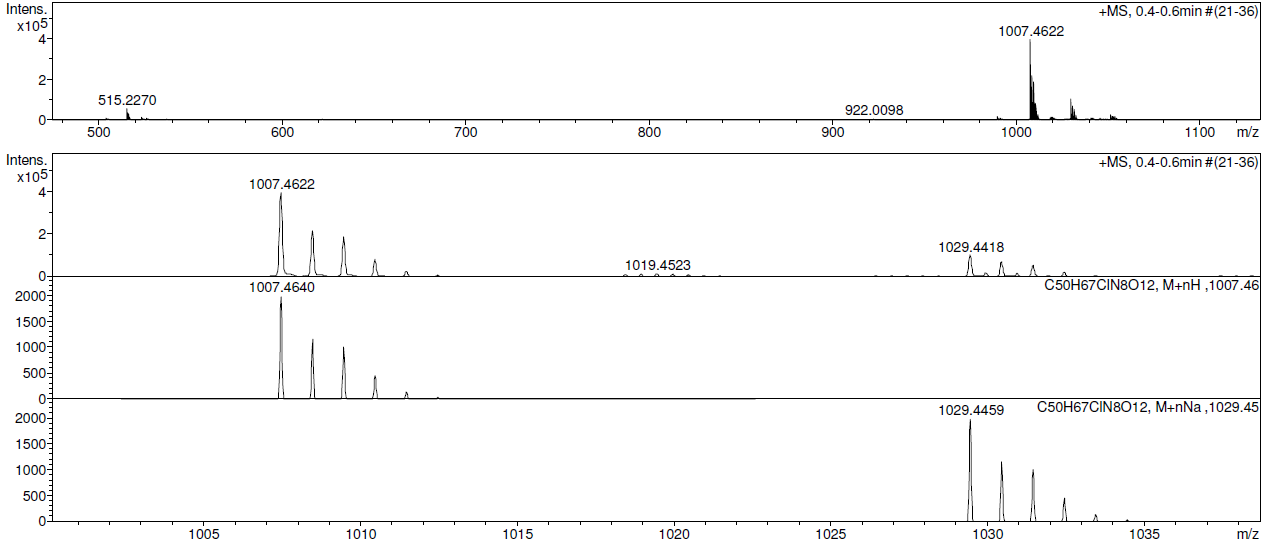


**Figure S30**. HRMS (m/z, ESI) of compound № **18**

**Compound 19**

**Figure S31**. 1H NMR spectrum of compound № **19** in DMSO-*d6*.

**Figure S32**. 13C NMR spectrum of compound № **19** in DMSO-*d6*.

**Figure S33**. HRMS (m/z, ESI) of compound № **19**

**Compound 20**

**Figure S34**. 1H NMR spectrum of compound № **20** in DMSO-*d6*.

**Figure S35**. 13C NMR spectrum of compound № **20** in DMSO-*d6*.

**Figure S36**. HRMS (m/z, ESI) of compound № **20**

**Compound 21**

**Figure S37**. 1H NMR spectrum of compound № **21** in DMSO-*d6*.

**Figure S38**. 13C NMR spectrum of compound № **21** in DMSO-*d6*.

**Figure S39**. ESI-MS of compound № **21**

**Figure S40**. HRMS (m/z, ESI) of compound № **21**

**Compound 22**

**Figure S41**. 1H NMR spectrum of compound № **22** in DMSO-*d6*.

**Figure S42**. 13C NMR spectrum of compound № **22** in DMSO-*d6*.

**Figure S43**. ESI-MS of compound № **22**

**Figure S44**. HRMS (m/z, ESI) of compound № **22**

| 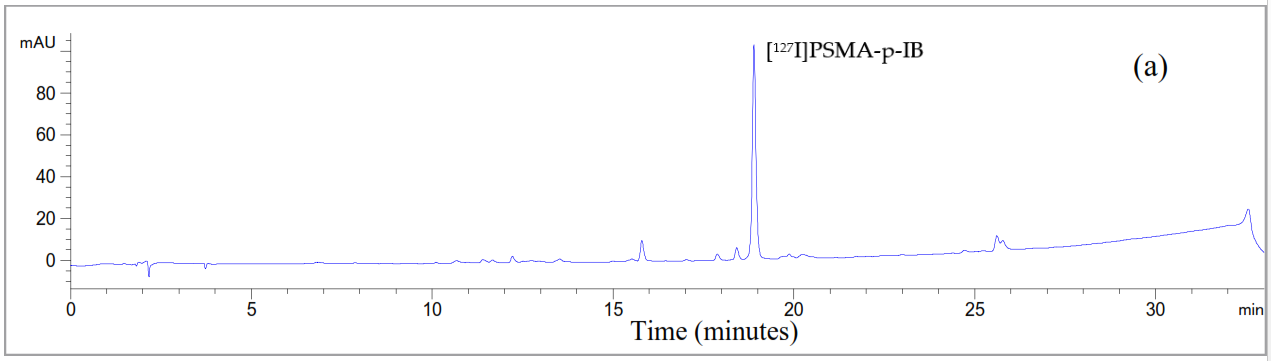 |
| --- |
| 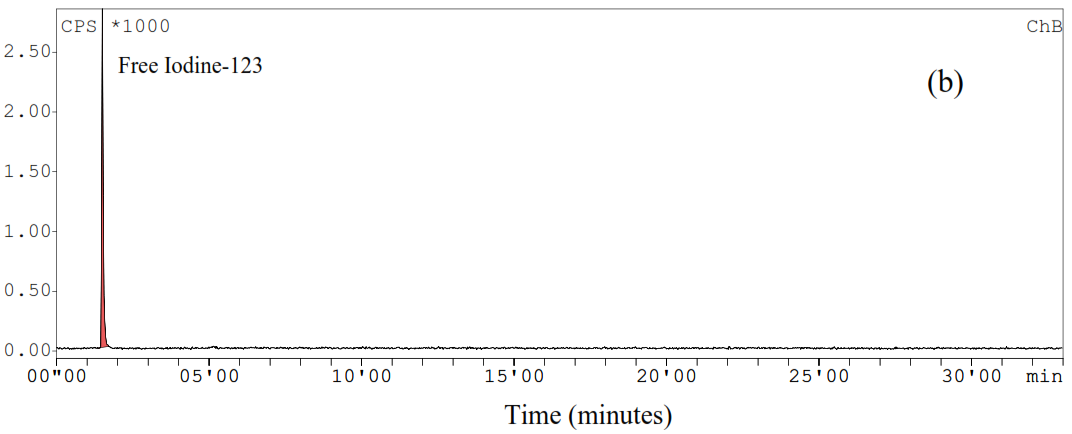 |
| 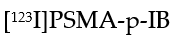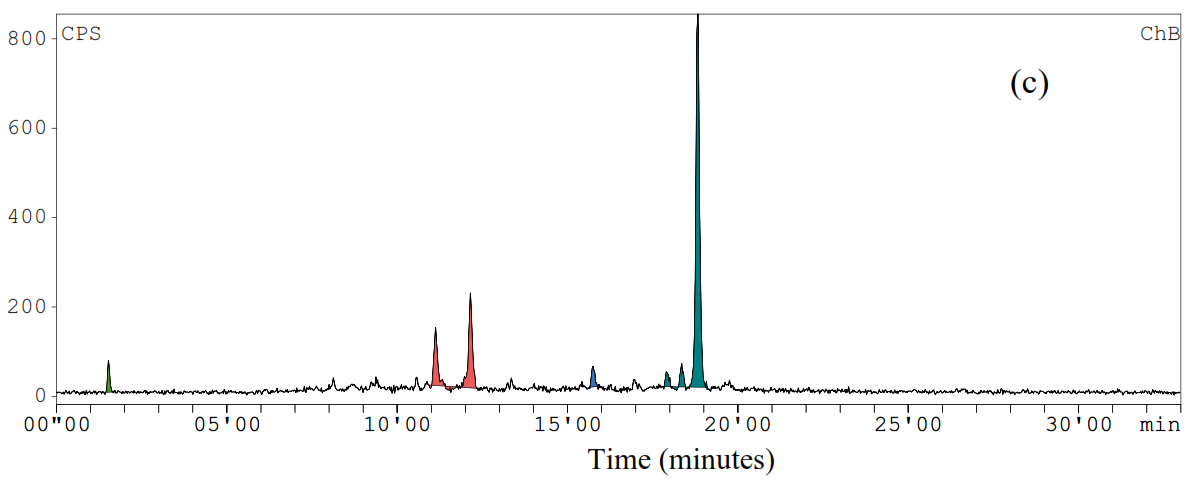 |
| 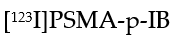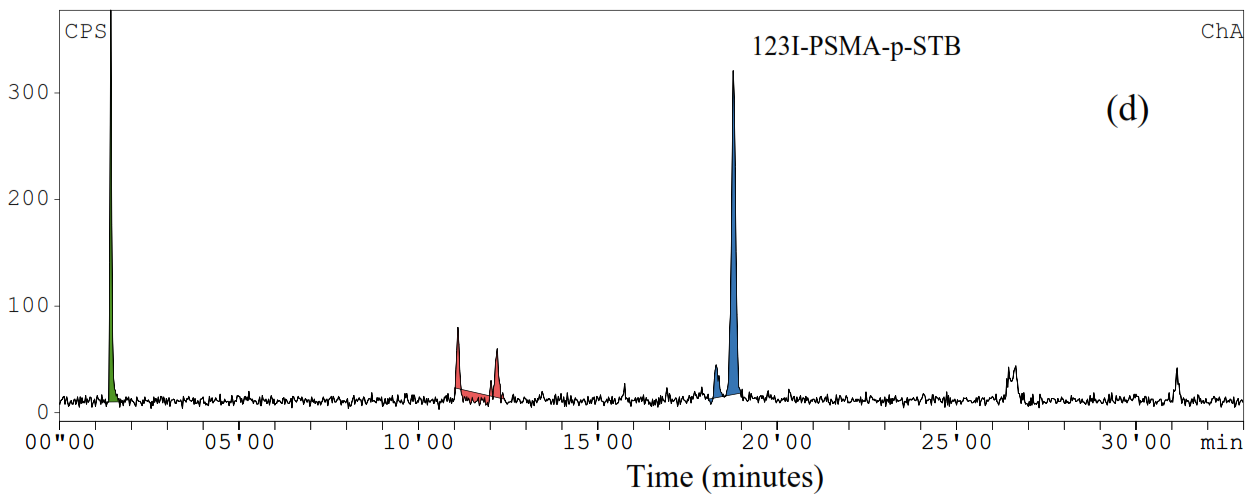 |

**Figure S45**. Radio-HPLC chromatograms of (a) [127I]PSMA-p-IB reference sample, (b) blank solution, (c) radiolabeling yield with [123I]PSMA-p-IB yield of 69.99%, and (d) radiolabeling yield with [123I]PSMA-p-IB yield of 65.73%.

**Figure S46**. Radio-iTLC chromatogram of [123I]PSMA-p-IB based on the results of radiolabeling optimization (the left peak: [123I]PSMA-p-IB, the right peak: free Iodine-123). The chromatography was performed using iTLC-SG glass fiber sheet with a developing solution of CH3CN/H2O, 95/5 (v/v).

| (a)  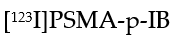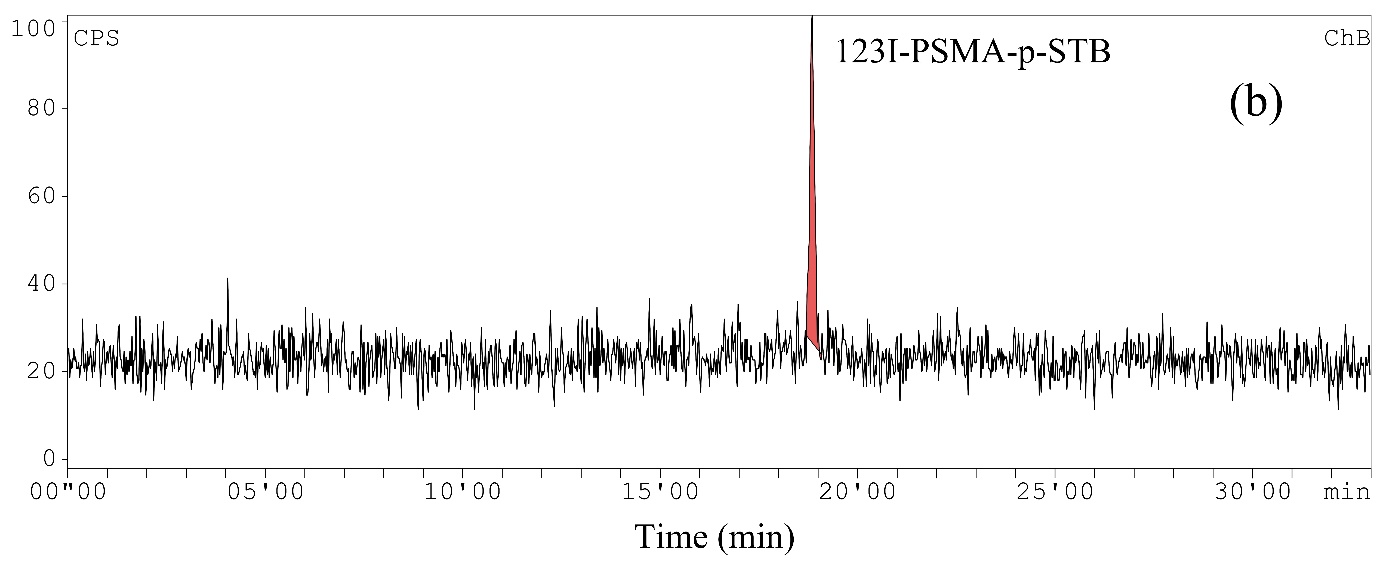 |
| --- |

**Figure S47**. Chromatograms of [123I]PSMA-p-IB after purification analyzed by (a) Radio-TLC-SG 60 F254 and (b) Radio-HPLC


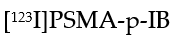

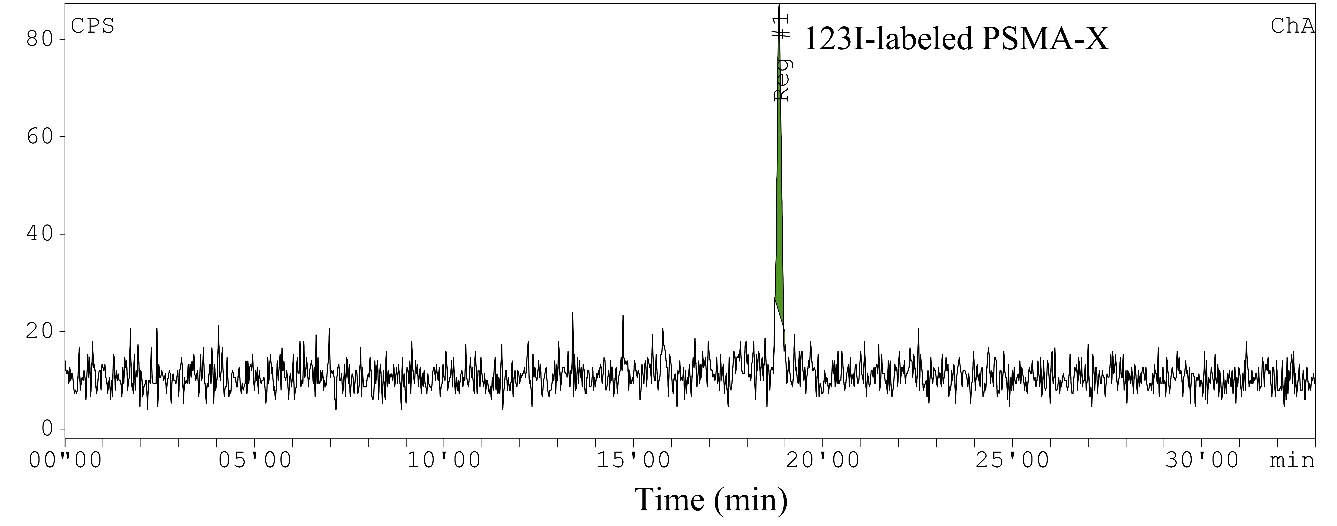


**Figure S48**. Radio-HPLC chromatogram of [123I]PSMA-p-IB after 3 days storage period

(a)

**
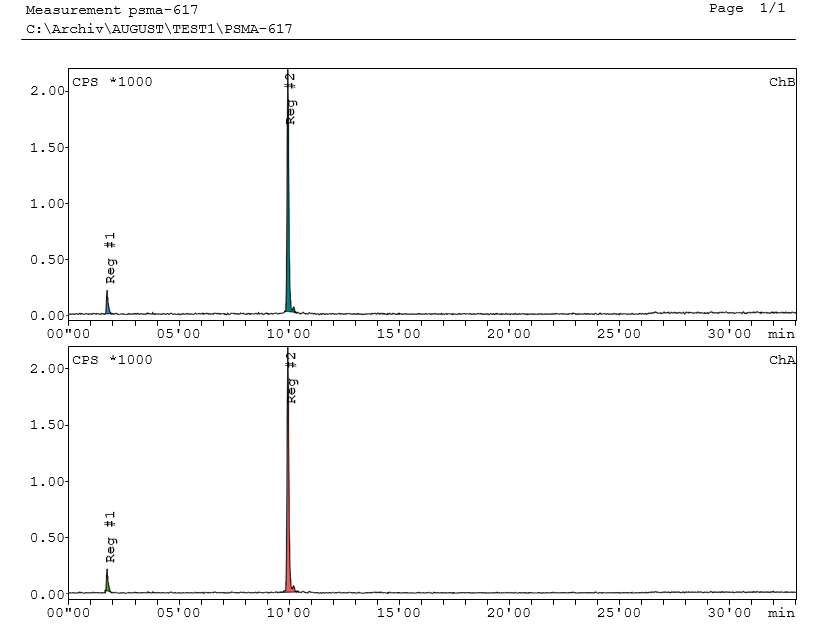
**

[177Lu]Lu-PSMA-617

(b)

**Figure S49**. Chromatograms of [177Lu]Lu-PSMA-617 by (a) Radio-iTLC and (b) Radio-HPLC
